# Supplementary material for: Investigating body patterning in aquarium-raised flamboyant cuttlefish (Metasepia pfefferi)
Source: PubMed Central journal article supplement (PMC4878381; doi:10.7717/peerj.2035), 2016-05-17

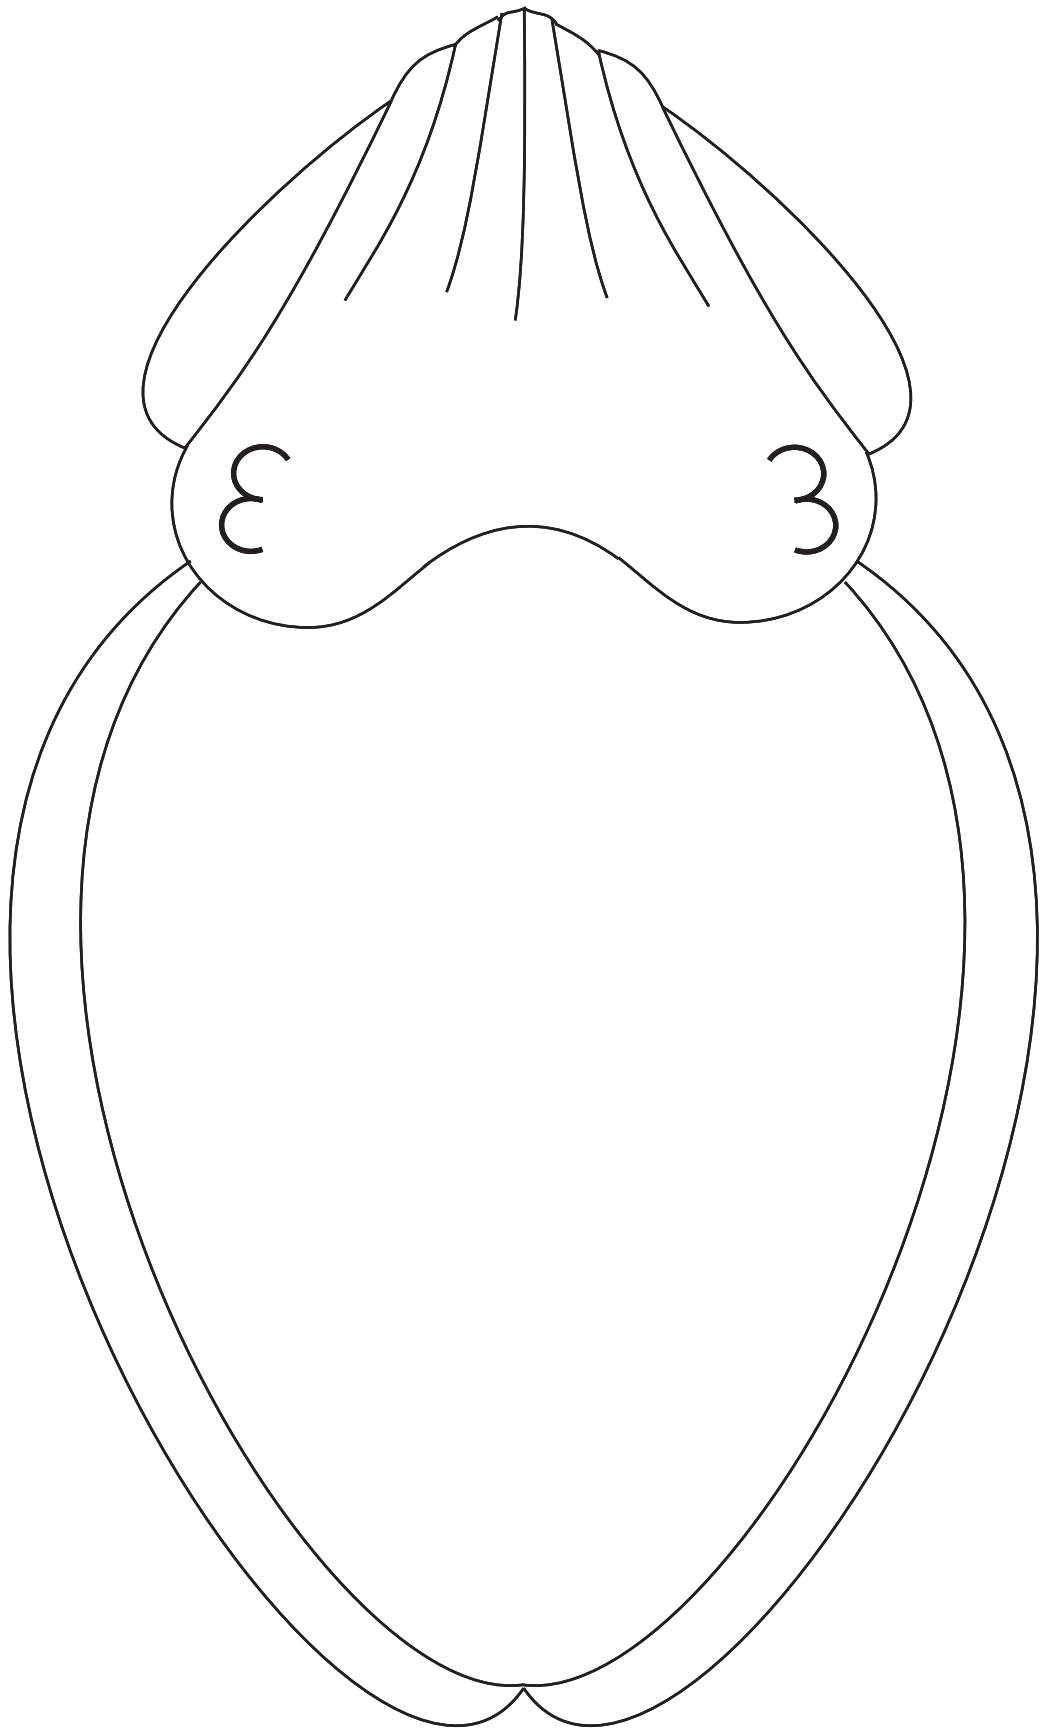

Supplement: peerj-04-2035-s001.pdf [file peerj-04-2035-s001.pdf]
